# Supplementary material
Source: MDPI journal article supplement (https://www.mdpi.com/2306-5710/4/2/30)
Supplement: s1 [file s1]

## Supplementary Materials

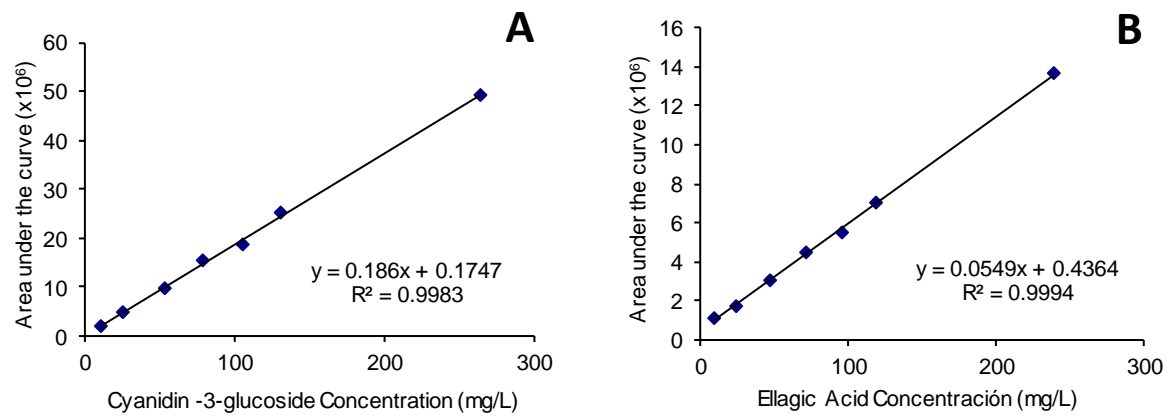

**Figure S1.** Calibration curve used for the HPLC quantification of anthocyanins and ellagitannins.

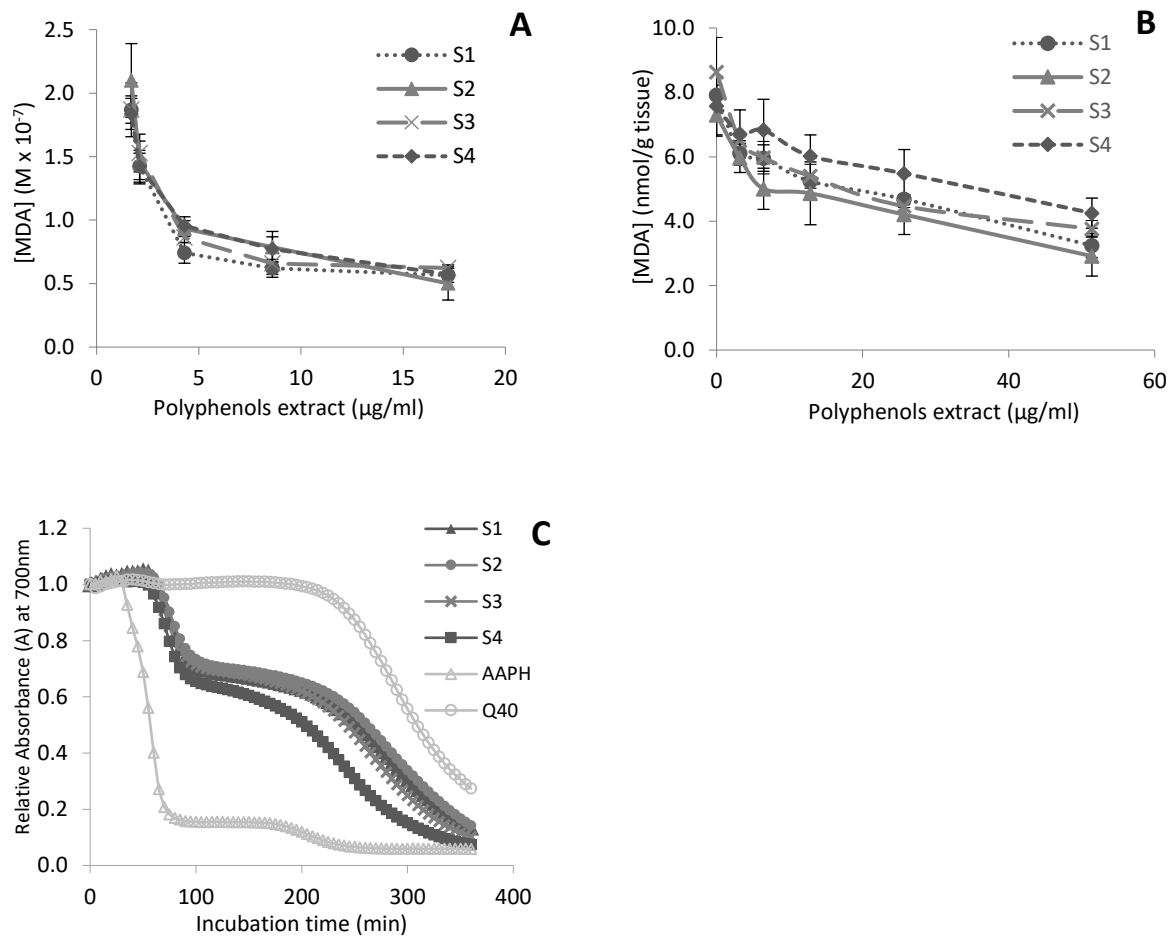

**Figure S2.** Inhibitory capacity of the digested blackberry juice polyphenols against lipid peroxidation in liposomes (A), liver homogenates (B), and erythrocytes (C). Each value is the mean  $\pm$  S.E. (three independent experiments).
